# Supplementary material
Source: PubMed Central journal article supplement (PMC8323053)
Supplement: jamaoncol-e212328-s003.pdf [file jamaoncol-e212328-s003.pdf]

# Data Sharing Statement

Tsakiridis. Metformin in Combination With Chemoradiotherapy in Locally Advanced Non-Small Cell Lung Cancer. *JAMA Oncol.* Published July 29, 2021. doi:10.1001/jamaoncol.2021.2328

## Data

**Data available:** Yes

**Data types:** Deidentified participant data

**How to access data:** [gpond@mcmaster.ca](mailto:gpond@mcmaster.ca)

**When available:** beginning date: 01-01-2023

## Supporting Documents

**Document types:** None

## Additional Information

**Who can access the data:** researchers whose proposed use of the data has been approved

**Types of analyses:** analysis whose proposed use of the data has been approved

**Mechanisms of data availability:** after approval of a proposal
